# Supplementary material
Source: MDPI journal article supplement (https://www.mdpi.com/2227-9040/9/4/63)
Supplement: s1 [file s1]

## **Supplementary Materials for**

### **A Sensitive and Portable deep-UV Absorbance Detector with a Microliter Gas Cell Compatible with Micro GC**

**Sulaiman Khan** <sup>1,2,4,5</sup>, **David Newport** <sup>1,2,3</sup> and **Stéphane Le Calvé** <sup>4,5\*</sup>

<sup>1</sup> School of Engineering, University of Limerick, Limerick, Ireland.

<sup>2</sup> Bernal Institute, University of Limerick, Limerick, Ireland.

<sup>3</sup> Health Research Institute, University of Limerick, Limerick, Ireland.  
sulaiman.khan@ul.ie, david.newport@ul.ie

<sup>4</sup> Université de Strasbourg, CNRS, ICPEES UMR 7515, F-67000  
Strasbourg, France.  
slecalve@unistra.fr.

<sup>5</sup> In'Air Solutions, Strasbourg France.

\* Correspondence: slecalve@unistra.fr

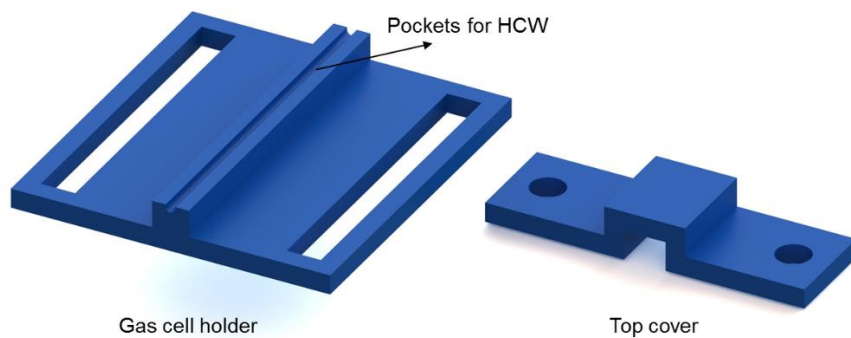

**Figure S01.** The rendered image of the 3D printed housing for HCW. Multiple housing/holders were 3D printed and installed on the optical breadboard to support and align the HCW.

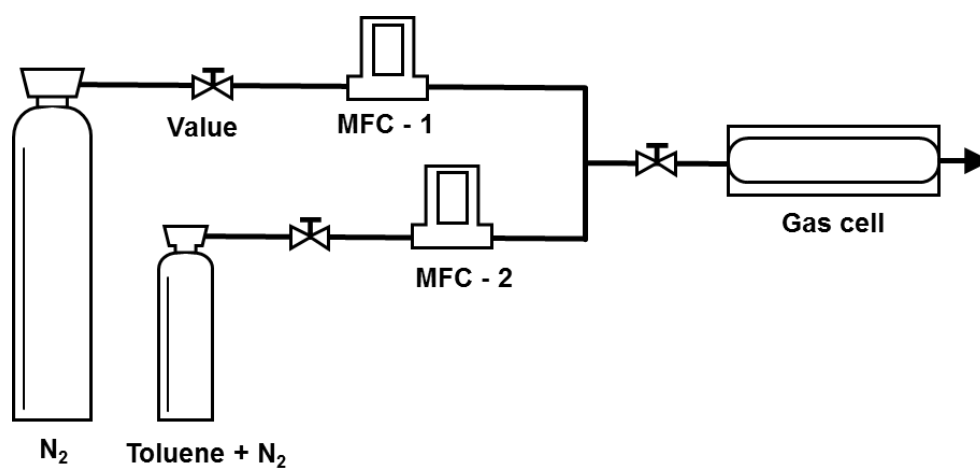

**Figure S02.** Gas generation setup for different concentrations of Toluene in N<sub>2</sub>. MFC- Mass Flow Controller.

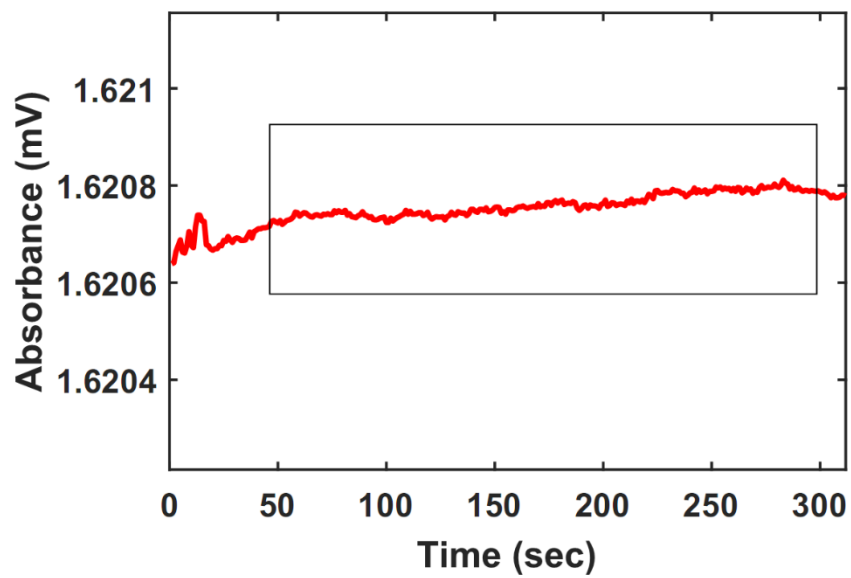

**Figure S03.** The signal (absorbance) recorded for gaseous Nitrogen flow. The box represents the time window for calculating the noise (i.e., the standard deviation).
